# Supplementary material for: Disinfection tackling the COVID-19 pandemic causes disinfection by-products (DBPs) accumulation and threatens aquatic ecosystems
Source: Research Square preprint supplement (doi:10.21203/rs.3.rs-608546/v1), 2021-06-22
Supplement: Supplementary file 2 [file ddbf68992163470f8d4b8f8f.docx]

**Supplementary Material**

**Disinfection tackling the COVID-19 pandemic causes disinfection by-products (DBPs) accumulation and threatens aquatic ecosystems**

Xian Zhanga, Leyun Wanga, Shanshan Chena, Haibo Lingb, Weiwei Lib, Chuan Yib, Xinzi Wanga, Yucheng Xiea, Yi Liua, Jiuhui Qua, c, Xia Huanga,*, Dayi Zhanga,*

1. State Key Joint Laboratory of Environment Simulation and Pollution Control, School of Environment, Tsinghua University, Beijing 100084, P.R. China
2. Hubei Academy of Environmental Sciences, Wuhan 430072, P.R. China
3. Key Laboratory of Drinking Water Science and Technology, Research Center for Eco-Environmental Sciences, Chinese Academy of Sciences, Beijing 100085, P.R. China

**Corresponding author**

Prof. Xia Huang

School of Environment, Tsinghua University, Beijing 100084, P.R. China

Tel: +86(0) 10-62772324; Fax: +86(0)10-62795687

Email: xhuang[@tsinghua.edu.cn](mailto:zhangdayi@tsinghua.educ.n)

Dr Dayi Zhang

School of Environment, Tsinghua University, Beijing 100084, P.R. China

Tel: +86(0)10-62773232; Fax: +86(0)10-62795687

Email: [zhangdayi@tsinghua.edu.cn](mailto:zhangdayi@tsinghua.edu.cn)

**Table S1.** Geographic location of 110 sampling sites in nine lakes and two rivers of Wuhan, China.

| **Types** | **Sampling sites** | **Sampling number** | **District** |
| --- | --- | --- | --- |
| Lake | HJH | 12 | Hongshan |
| NH | 10 | Hongshan |
| LZH | 9 | Jiangxia |
| MSH | 8 | Hanyang |
| HGH | 11 | Caidian |
| DH | 12 | Wuchang |
| HH | 8 | Huangpi |
| JYH | 12 | Dongxihu |
| TXH | 11 | Hongshan |
| River | YR | 11 | Across Wuhan |
| HR | 6 | Across Wuhan |

**Table S2.** CHO cytotoxicity and SCGE genotoxicity of each DBPs.

| **DBPs** | **LC50 (M)** | **Midpoint of tail moment (M)** |
| --- | --- | --- |
| TCM | 9.62×10-3 | NA |
| TBM | 3.96×10-3 | NA |
| DBCM | 5.36×10-3 | NA |
| BDCM | 1.15×10-2 | NA |
| MCAA | 8.10×10-4 | 4.11×10-4 |
| DCAA | 7.30×10-3 | NA |
| TCAA | 2.40×10-3 | NA |
| TCAN | 1.60×10-4 | 1.01×10-3 |
| BCAN | 8.46×10-6 | 3.24×10-4 |
| TCNM | 5.36×10-4 | 9.34×10-5 |
| NDMA | 4.04×10-6 | NA |
| NMOR | 2.15×10-5 | NA |
| NPYR | 9.99×10-6 | NA |
| NMEA | 1.70×10-5 | NA |
| NDEA | 1.96×10-6 | NA |
| NPIP | 1.53×10-5 | NA |
| NDPA | 2.69×10-5 | NA |
| NDBA | 9.49×10-5 | NA |
| NDphA | 1.76×10-2 | NA |

NOTE: NA represented Not Available

**Table S3.** LC50 or EC50 of each DBPs for fish, daphnid, and green algae.

|  | **LC50** | **LC50** | **EC50** |
| --- | --- | --- | --- |
|  | **Fish (96 h, mg/L)** | **Daphnid (48 h, mg/L)** | **Green algae (96 h, mg/L)** |
| **TCM** | 264.07 | 143.45 | 89.00 |
| **BDCM** | 301.16 | 164.96 | 105.90 |
| **DBCM** | 318.18 | 175.73 | 116.74 |
| **TBM** | 320.86 | 178.68 | 122.82 |
| **MCAA** | 2561.29 | 189.20 | 0.025 |
| **DCAA** | 2411.78 | 194.28 | 0.032 |
| **TCAA** | 460.34 | 57.71 | 0.03 |
| **TCAN** | 0.87 | 0.46 | 0.046 |
| **BCAN** | 1.27 | 0.61 | 0.058 |
| **TCNM** | 552.48 | 294.57 | 169.17 |
| **NDMA** | 770.51 | 67.58 | 102.31 |
| **NDEA** | 240.40 | 23.64 | 28.55 |
| **NMEA** | 435.95 | 40.48 | 54.74 |
| **NDPA** | 69.35 | 7.64 | 7.36 |
| **NDBA** | 19.08 | 2.36 | 1.81 |
| **NPYR** | 279.34 | 27.11 | 33.60 |
| **NMOR** | 874.78 | 78.65 | 113.37 |
| **NPIP** | 151.50 | 15.57 | 17.23 |
| **NDPhA** | 6.57 | 0.90 | 0.57 |
